# Supplementary material
Source: PubMed Central journal article supplement (PMC3320198)
Supplement: supp_pp.111.189829_189829supp.pdf [file supp_pp.111.189829_189829supp.pdf]

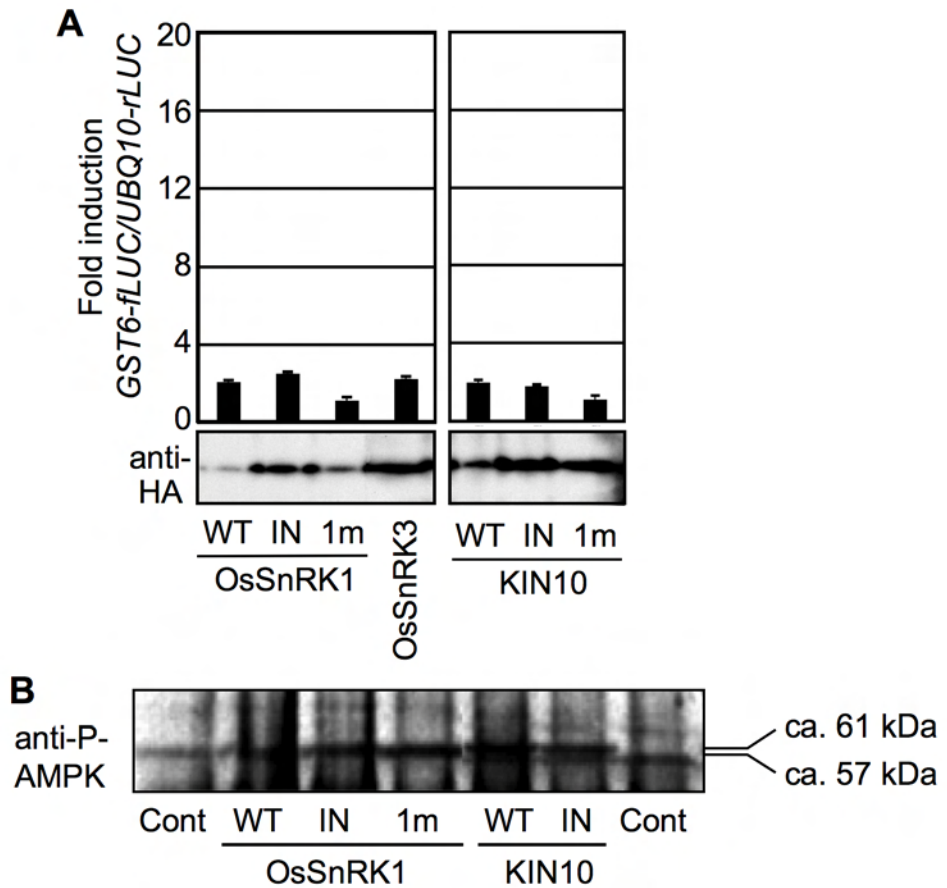

**Supplemental Figure S1.** Plant SnRK1 did not activate a general stress-responsive *GST6* promoter activity. A, Reporter activities of *GST6-fLUC* were measured upon expression of WT or inactive forms of SnRK1. Inactive forms were ATP-binding site (IN)- and catalytic site (1m)-mutated SnRK1s. Protoplasts were cotransfected with a designated effector, *GST6-fLUC* and *UBQ10-rLUC* constructs. *UBQ10* promoter activity served as transfection control. HA-tagged SnRK1 expression was shown by protein blot analysis using anti-HA antibody. B, The phosphorylation of *OsSnRK1*, *KIN10* and their mutated forms were detected by protein blot analysis by using anti-phospho-AMPK $\alpha$  antibody.

**A**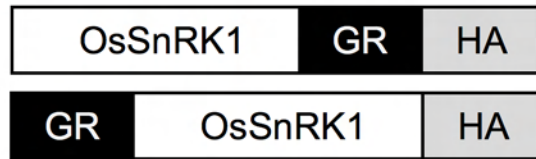**B**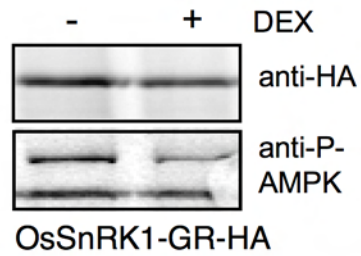**C**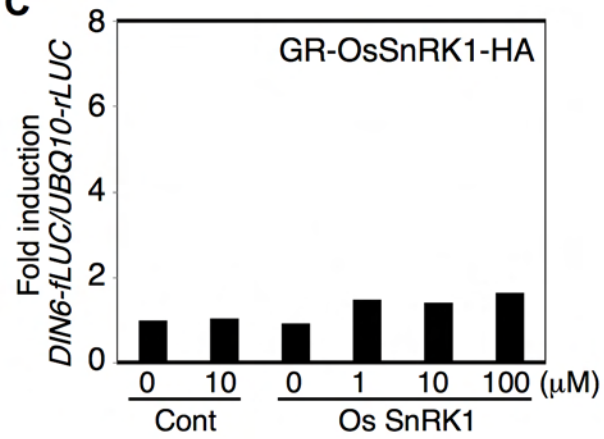**D**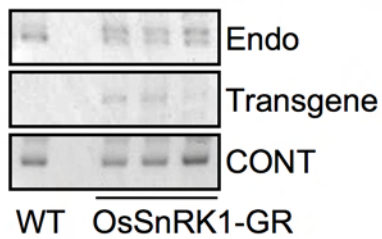

**Supplemental Figure S2.** SnRK1 localized in the nucleus and affected gene expression. A, Schematic diagrams of glucocorticoid receptor (GR), OsSnRK1 and hemagglutinin epitope (HA) fusion constructs. B, Protein abundance and phosphorylation of the T-loop of OsSnRK1-GR-HA were detected by protein blot analysis using anti-HA and anti-phospho-AMPK $\alpha$  antibody, respectively. C, Even with DEX treatment, GR-OsSnRK1-HA could not activate DIN6-LUC reporter. The experiments were repeated twice with consistent results. The means of triplicate measurements were shown with standard error bars. D, Transcript abundance of endogenous and *SnRK1-GR* transgenic plants was determined by using semi-quantitative RT-PCR. *UBQ10* served as an internal control.

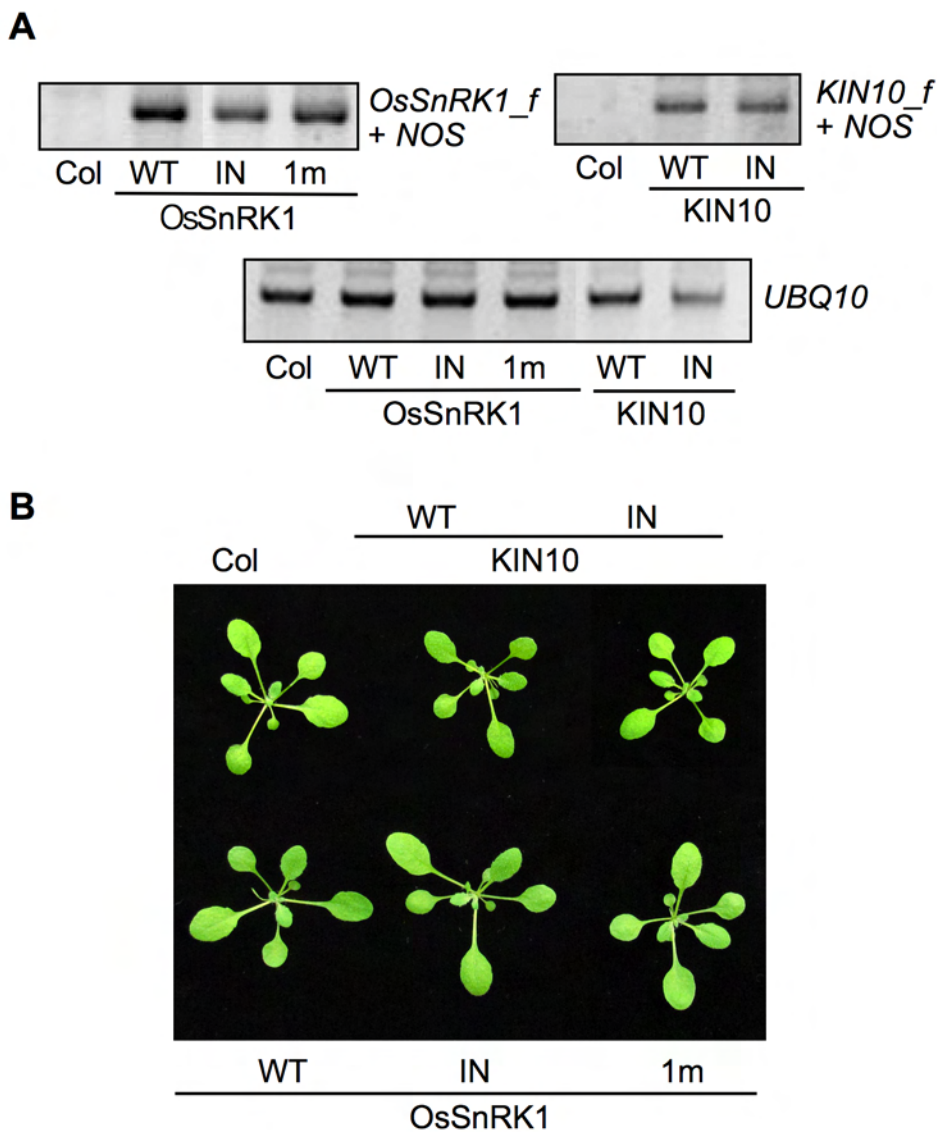

**Supplemental Figure S3.** Transcript abundance of *OsSnRK1*, *KIN10*, and their mutated forms in stably transformed *Arabidopsis* transgenic plants. A, Transcript abundance was determined by using semi-quantitative RT-PCR. *UBQ10* served as an internal control. B, *SnRK1* transgenic plants grew normally in soil at 23°C under a 16 h photoperiod ( $60 \mu\text{molm}^{-2}\text{s}^{-1}$ ).

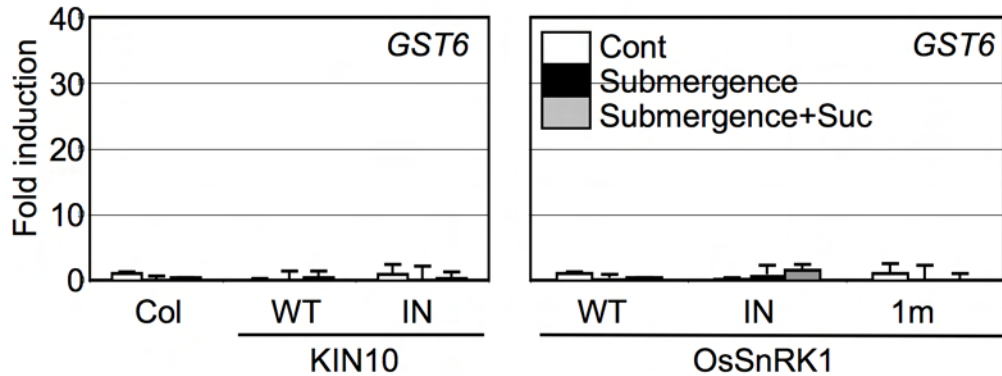

**Supplemental Figure S4.** The *GST6* gene expression was not induced by *OsSnRK1* or *KIN10* under flooding. Gene expression was measured by using real time RT-PCR. RNA was extracted from Col as well as transgenic plants expressing WT and inactive forms of *OsSnRK1* or *KIN10* under the flooding condition (24 h) in the absence or presence of 90 mM sucrose.

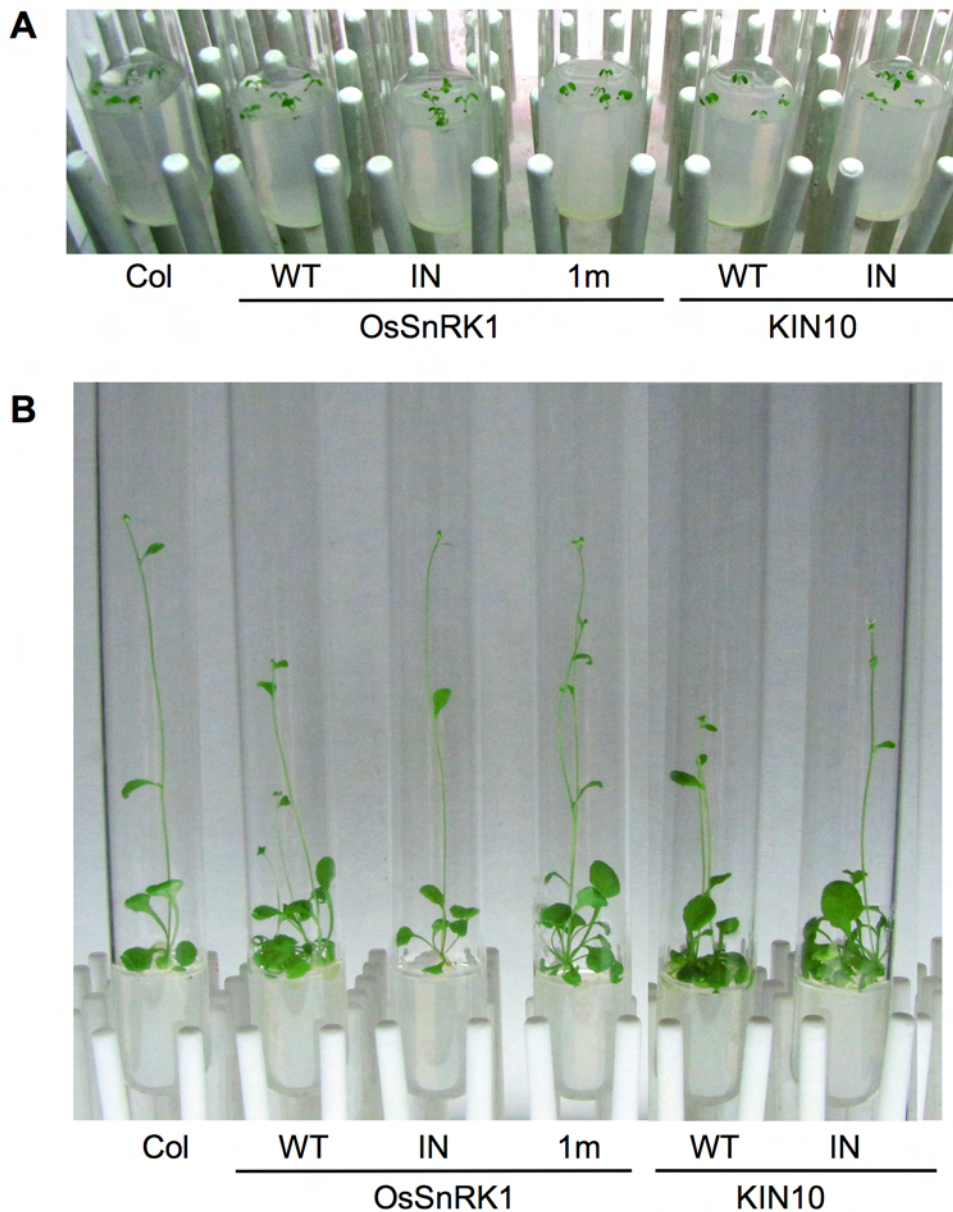

**Supplemental Figure S5.** Col and transgenic plants expressing WT and inactive forms of *OsSnRK1* and *KIN10* showed similar seedling growth in A, 3 d and B, 30 d after germination. Plants were grown inside of 30 ml test tube holding 5 ml of MS agar medium containing 0.5% sucrose under a photoperiod of 16 h light/8 h dark ( $50 \mu\text{molm}^{-2}\text{s}^{-1}$ ) at 23°C. Seeds were stratified at 4°C for 4 d before plating.

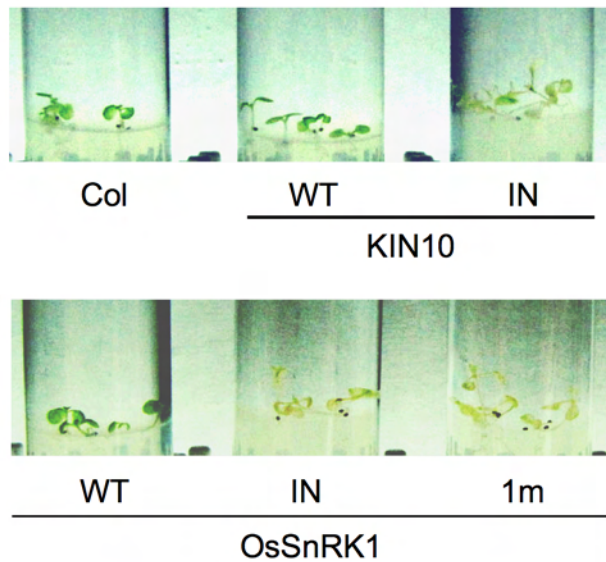

**Supplemental Figure S6.** Detailed photo of Col and *SnRK1* expressing transgenic seedling development under flooding. Col as well as transgenic seedlings expressing WT forms of *SnRK1* maintained green leaves during prolonged flooding conditions in the dark. Experiments repeated three times with triplicates and showed consistent results.

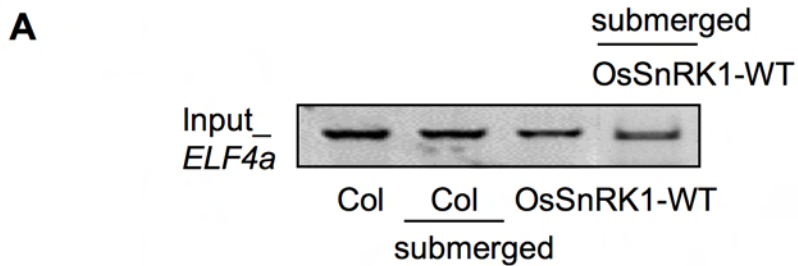

**B**

>PDC1\_4  
 AGCAATTACACTTCTTCATTGAAACTTTAAAAGTGAACCCAAAGAATTA  
 ACTCAATAATA **ACTGAT** GAGTATACAAATTATTGTTTCCGGCTAAAAA

↑  
 putative ATB2/AtbZIP53/AtbZIP44/GBF5 binding site

CCTGAAATTAAC **TCAAATTTGGAATGGGGA**

**Supplemental Figure S7.** For the comparison of SnRK1-DNA association with and without submergence. A, PCR product before ChIP was shown as input controls. B, DNA sequences of PDC1\_4 were shown. A well conserved putative ATB2/AtbZIP53/AtbZIP44/GBF5 binding site was shown in red and a specific primer set for this region was shown in green.



**Supplemental Table S1. Oligonucleotides for qRT-PCR.**

---

| Oligo name          | Oligonucleotide (5' - 3')   |
|---------------------|-----------------------------|
| <i>ADH1_f</i> :     | TTGCTCCACCGCAGAAACAC        |
| <i>ADH1_r</i> :     | CCAACACTCTCAACAATCCCTCC     |
| <i>CYP94B3_f</i> :  | CGGGAAGAGATACAACGTCAG       |
| <i>CYP94B3_r</i> :  | GTCATCGTTCTCAGTCAACA        |
| <i>DIN1_f</i> :     | CAGAGTCGGATCAGGAATGG        |
| <i>DIN1_r</i> :     | ATTTGACCGCTCTCACAACC        |
| <i>DIN6_f</i> :     | AACTTGTCGCCAGATCAAGG        |
| <i>DIN6_r</i> :     | GGAACACGTGCCTCTAGTCC        |
| <i>GST6_f</i> :     | CGCGTCCTCGCTACTCTTTAC       |
| <i>GST6_r</i> :     | GAGCAGGAATTTGACCGAAG        |
| <i>PDC1_f</i> :     | TGATGCTTCAGGCTATGCTTT       |
| <i>PDC1_r</i> :     | GTTGAAGATTGGACCTGCAAA       |
| <i>TCH4_f</i> :     | TGAAGCTTGTCCTGGAAAC         |
| <i>TCH4_r</i> :     | GCCTTGTGTGTAGACATTTGTGTG    |
| <i>ELF4a_f</i> :    | TCATAGATCTGGTCCTTGAAAC      |
| <i>ELF4a_r</i> :    | GGCAGTCTCTTCGTG CTGAC       |
| <i>Tubulin4_f</i> : | AGGGAAAGGAAGAGAGGAAG        |
| <i>Tubulin4_r</i> : | GCTGGCTAATCCTACCTTTGG       |
| <i>UBQ10_f</i> :    | AGATCCAGGACAAGGAGGTATTC     |
| <i>UBQ10_r</i> :    | CGCAGGACCAAGTGAAGAGTAG      |
| <i>ADH1_6f</i> :    | CTTCTTCCAATTACCAGCTGC       |
| <i>ADH1_6r</i> :    | AAAAAGAAAACCTTTGCATCG       |
| <i>PDC1_4f</i> :    | AGCAATTACACTTCTTCATTGAAACTT |
| <i>PDC1_4r</i> :    | CCCCATTCCAAATTTGAGTTA       |

---
